# Supplementary material for: Microbiome Composition and Borrelia Detection in Ixodes scapularis Ticks at the Northwestern Edge of Their Range
Source: MDPI journal article supplement (doi:10.3390/tropicalmed5040173), 2020-11-18
Supplement: s1 [file s1]

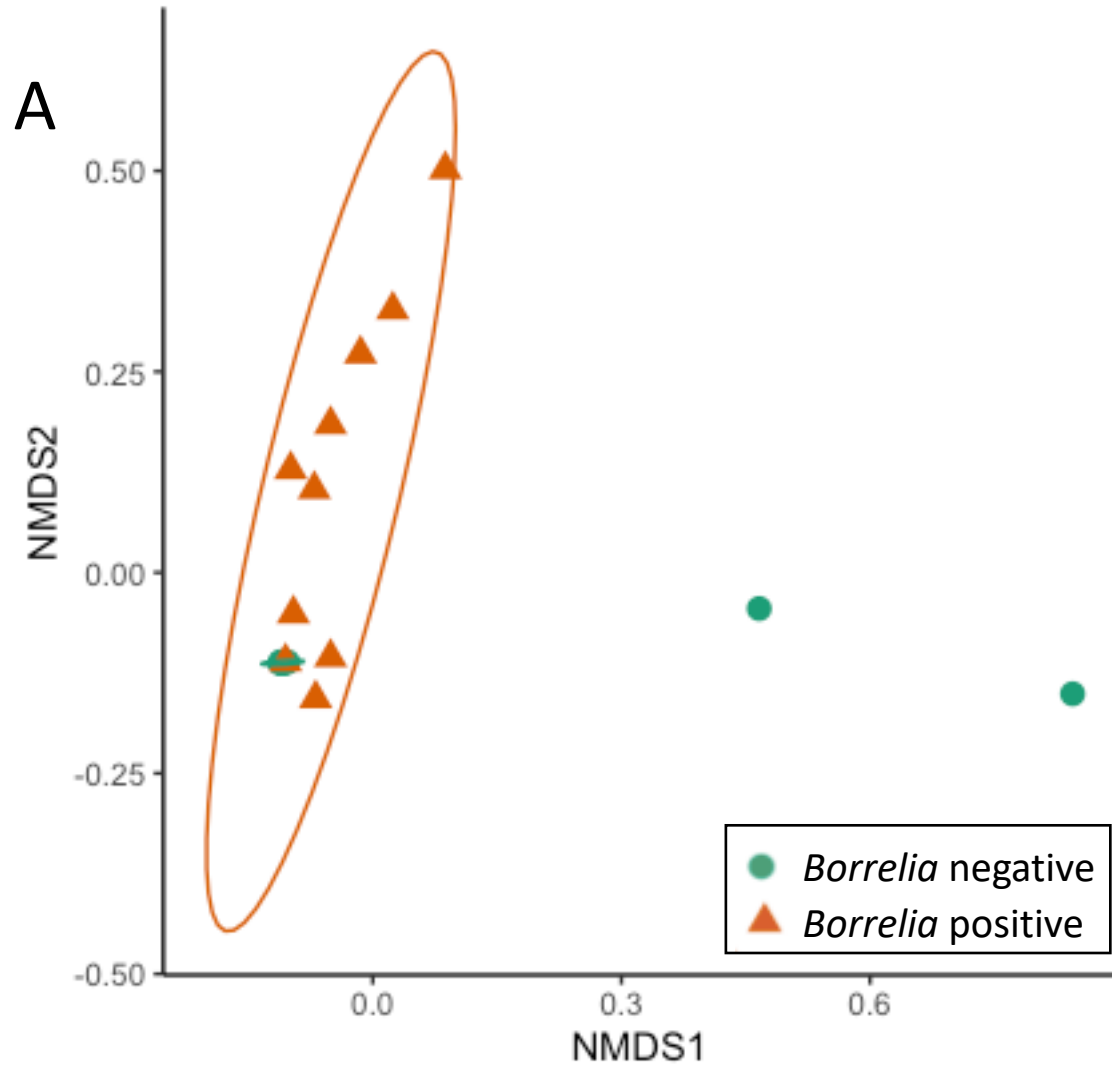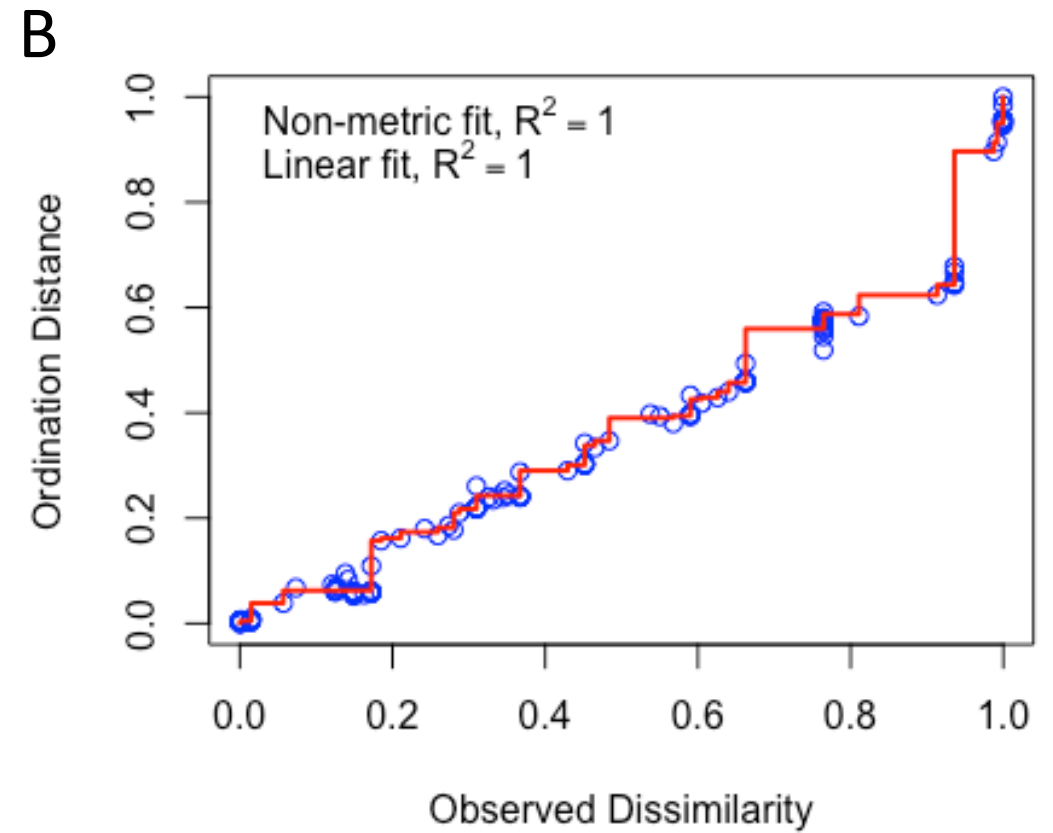

Suppl. Fig. 2. NMDS ordination (A) and 2-dimensional stress plot (B) of Bray Curtis dissimilarities among microbiome communities of *Borrelia*-negative and *Borrelia*-positive ticks. Ellipse in A is a multivariate t- distribution.
