# Supplementary material for: Microbiome Composition and Borrelia Detection in Ixodes scapularis Ticks at the Northwestern Edge of Their Range
Source: MDPI journal article supplement (doi:10.3390/tropicalmed5040173), 2020-11-18
Supplement: s1 [file s1]

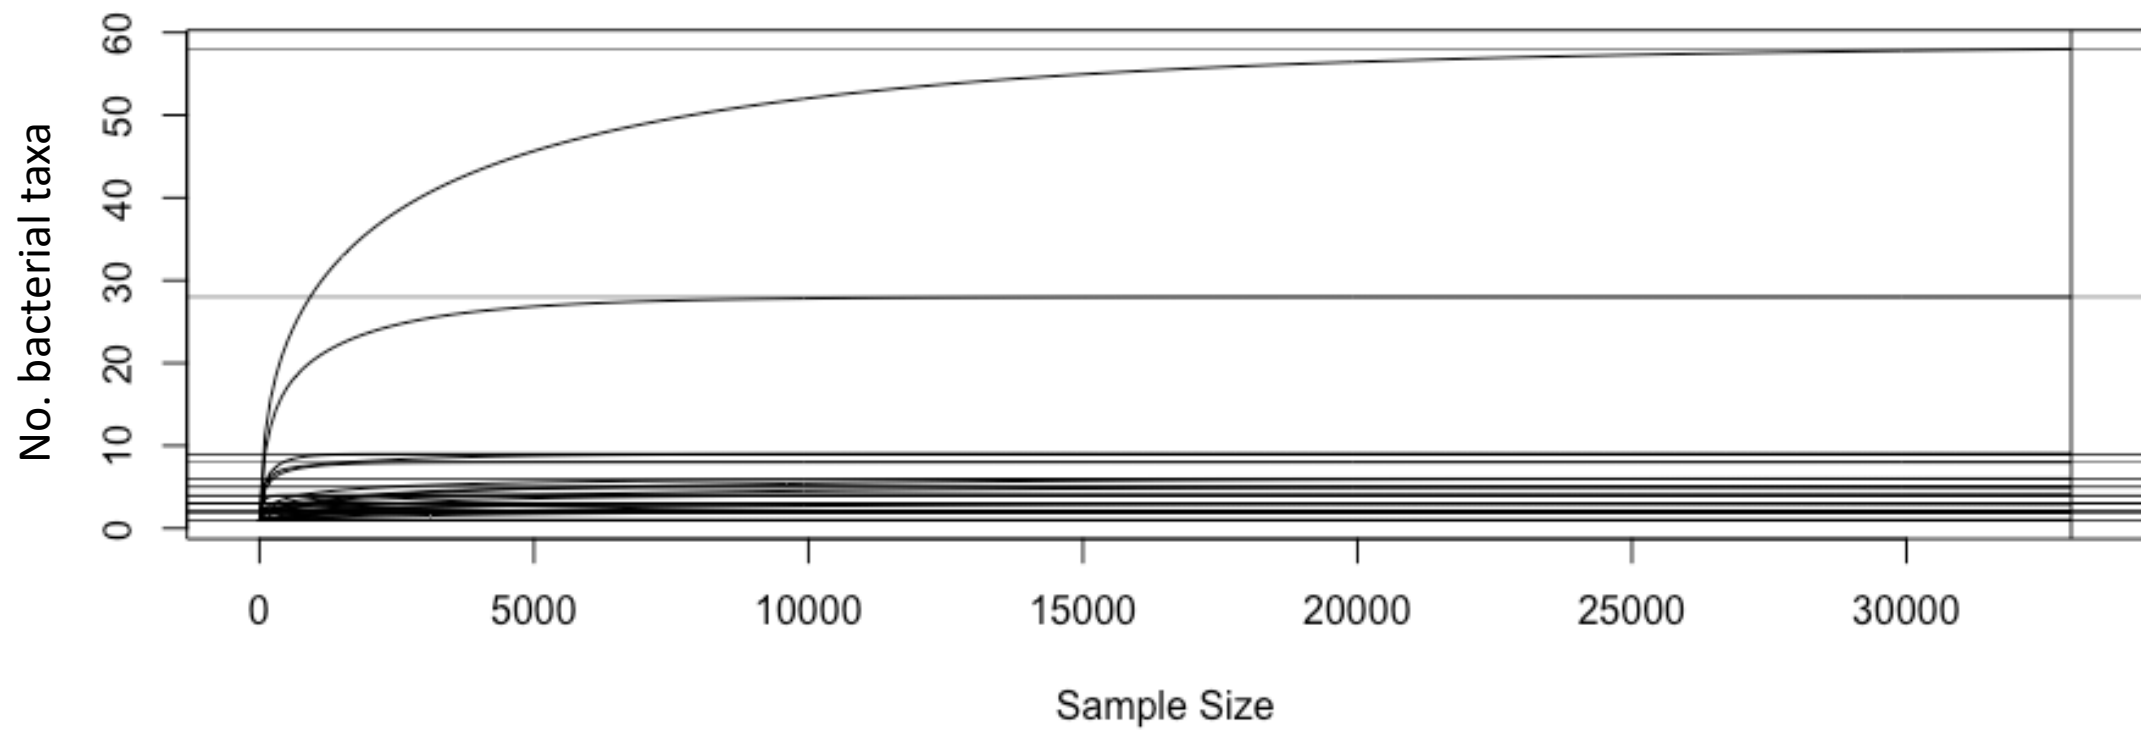

Supplementary Fig. 1. Rarefaction curves for the bacterial microbiome of 20 *Ixodes* ticks. Vertical line is at 33000 reads.
